# Supplementary material for: Trimethylamine N-Oxide Promotes Autoimmunity and a Loss of Vascular Function in Toll-like Receptor 7-Driven Lupus Mice
Source: MDPI journal article supplement (doi:10.3390/antiox11010084), 2021-12-30
Supplement: s1 [file s1]

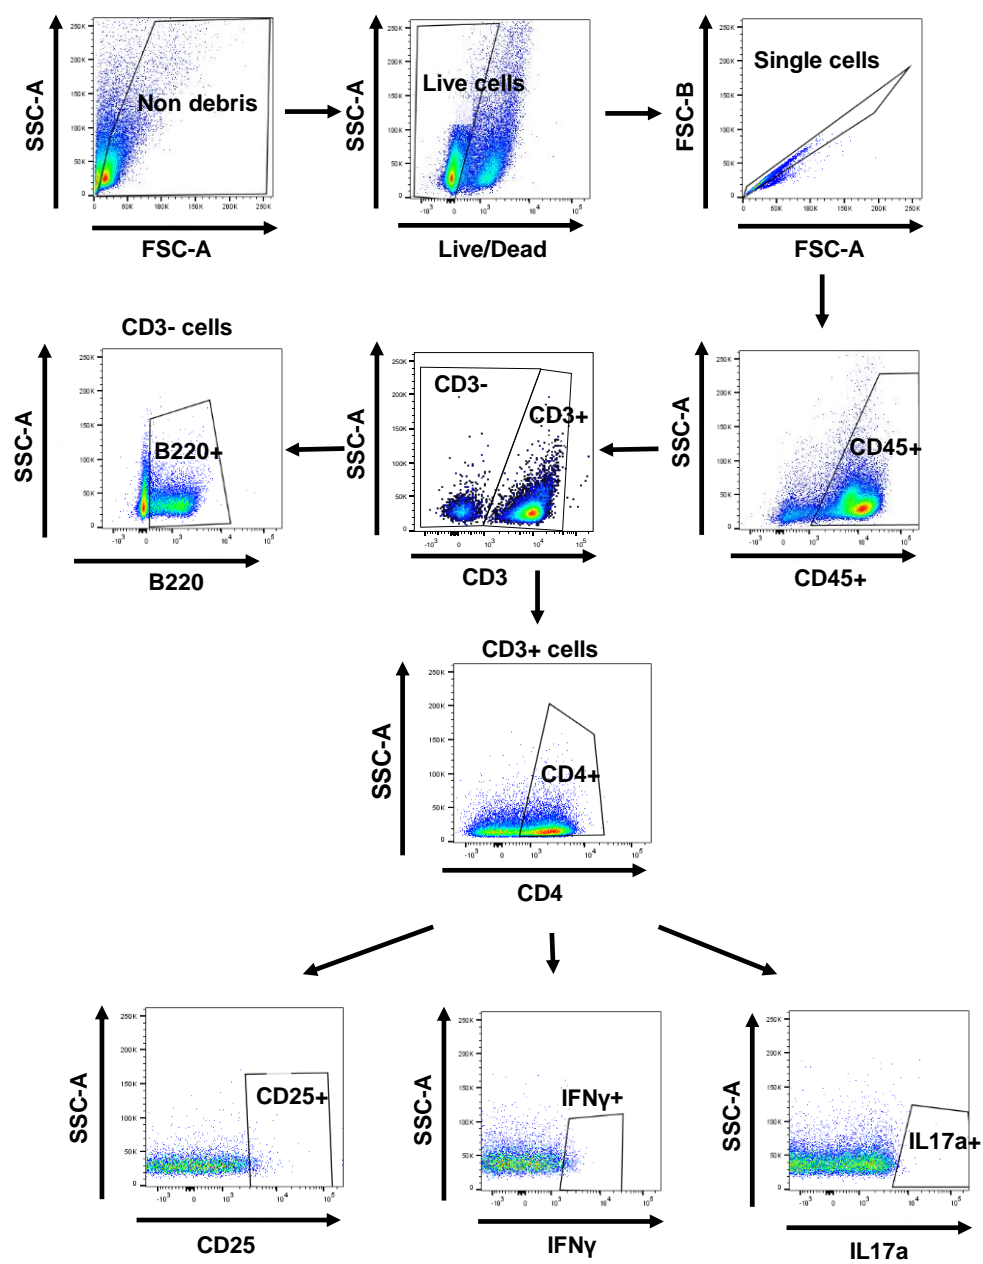

Figure S1. Gating strategy for flow cytometry.

**Table S1. Oligonucleotides for real-time RT-PCR**

| Accession number | mRNA targets                  | Descriptions                                | Sense                 | Antisense              |
|------------------|-------------------------------|---------------------------------------------|-----------------------|------------------------|
| NM_008713.4      | <i>eNOS</i>                   | endothelial nitric oxide synthase           | GCATGGGCAACTTGAAGAGTG | GGGAACACTGTGATGGCTGA   |
| NM_015760.5      | <i>NOX4</i>                   | NOX-1 subunit of NADPH oxidase              | GGATCACAGAAGGTCCCTAGC | TTGCTGCATTCAAGTCAAGG   |
| NM_001286037.1   | <i>P47phox</i>                | P47phox subunit of NADPH oxidase            | TCTTCAAAGTGCGGCCTGAT  | TGCCACGGTCATCTCTGTTC   |
| NM_010902.4      | <i>NRF2</i>                   | Nuclear factor-erythroid 2-related factor 2 | CTGAACTCCTGGACGGGACTA | CGGTGGGTCTCCGTAAATGG   |
| NM_016679.4      | <i>KEAP-1</i>                 | Kelch-like ECH-associated protein 1         | CCCATGAGGCATCACCGTAG  | CATAGCCTCCGAGGACGTAG   |
| NM_008706.5      | <i>NQO-1</i>                  | NADPH quinone dehydrogenase 1               | CATTCTGAAAGGCTGGTTTGA | CTAGCTTTGATCTGGTTGTCAG |
| NM_010442.2      | <i>HO-1</i>                   | Hemo-oxygenase-1                            | CCTCACTGGCAGGAAATCATC | CCTCGTGGAGACGCTTTACATA |
| NM_145827.4      | <i>NLRP3</i>                  | NLR family pyrin domain containing 3        | CCTGACCCAAACCCACCAGT  | TTCTTTCGGATGAGGCTGCTTA |
| NM_008361.4      | <i>IL-1<math>\beta</math></i> | Interleukin-1 beta                          | GCTACCTGTGTCTTTCCCGT  | CATCTCGGAGCCTGTAGTGC   |
| NM_010493.3      | <i>ICAM-1</i>                 | Intracellular adhesion molecule 1           | GGTTCTCTGCTCCTCCACAT  | CCTTCCAGGCTTTCTCTTTG   |
| NM_010503.2      | <i>IFN<math>\alpha</math></i> | Interferon alpha                            | GACTTTGGATTTCCTGAG    | AAGCCTTTGATGTGAAGAGGTC |
| NM_001289726.1   | <i>GAPDH</i>                  | Glyceraldehyde-3-phosphate dehydrogenase    | TGCACCACCAACTGCTTAGC  | GGATGCAGGGATGATGTTCT   |
